# Supplementary material for: Brief Communication: Global reconstructions of glacier mass change during the 20th century are consistent
Source: Copernicus journal article supplement (doi:10.5194/tc-9-2399-2015), 2015-12-17
Supplement: Supplementary file 1 [file tc-9-2399-2015-supplement.zip]

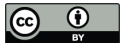

## *Supplement of*

# **Brief Communication: Global reconstructions of glacier mass change during the 20th century are consistent**

**B. Marzeion et al.**

*Correspondence to:* B. Marzeion ([ben.marzeion@uni-bremen.de](mailto:ben.marzeion@uni-bremen.de))

- [tc-9-2399-2015-supplement-title-page.pdf](#)
- [data\\_cogley\\_R1301.txt](#)
- [data\\_leclercq\\_etal\\_2011.txt](#)
- [data\\_leclercq\\_etal\\_update\\_2015.txt](#)
- [data\\_marzeion\\_etal\\_2012.txt](#)
- [data\\_marzeion\\_etal\\_2012\\_regional.txt](#)
- [data\\_marzeion\\_etal\\_update\\_2015.txt](#)
- [data\\_marzeion\\_etal\\_update\\_2015\\_regional.txt](#)
- [data\\_readme.txt](#)

The copyright of individual parts of the supplement might differ from the CC-BY 3.0 licence.
